# Supplementary material for: Insights into the catalytic properties of 4,3-α-glucanotransferase to guide the biofabrication of α-glucans with low digestibility
Source: Royal Society of Chemistry journal article supplement (doi:10.1039/d3fo04776h), 2024-01-01
Supplement: d3fo04776h1.pdf [file d3fo04776h1.pdf]

**Insights into the catalytic properties of 4,3- $\alpha$ -glucanotransferase to guide the biofabrication of  $\alpha$ -glucans with low digestibility**

Yuqi Yang <sup>1</sup>, Yujing Sun <sup>1</sup>, Tao Zhang <sup>1</sup>, Bruce R. Hamaker <sup>1,2</sup>, Ming Miao <sup>1\*</sup>

<sup>1</sup> *State Key Laboratory of Food Science & Technology, Jiangnan University, 1800 Lihu Avenue, Wuxi, Jiangsu 214122, P. R. China*

<sup>2</sup> *Whistler Center for Carbohydrate Research, Purdue University, 745 Agriculture Mall Drive, West Lafayette, IN 47907, United States*

\* Corresponding author. Address: State Key Laboratory of Food Science & Technology, Jiangnan University, 1800 Lihu Avenue, Wuxi, Jiangsu 214122, P. R. China.

Tel : +86 (0)510 853 27859, Fax: +86 (0)510 859 19161.

*E-mail address:* [miaoming@jiangnan.edu.cn](mailto:miaoming@jiangnan.edu.cn) (Miao M.)

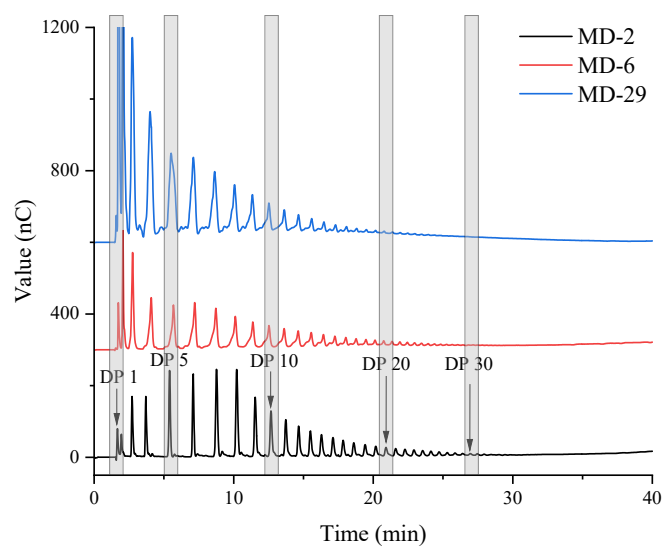

Fig.S1. HPAEC profile of MD-2, MD-6, and MD-29.

(a)

Apr04-2023  
MM-Y1Q-001

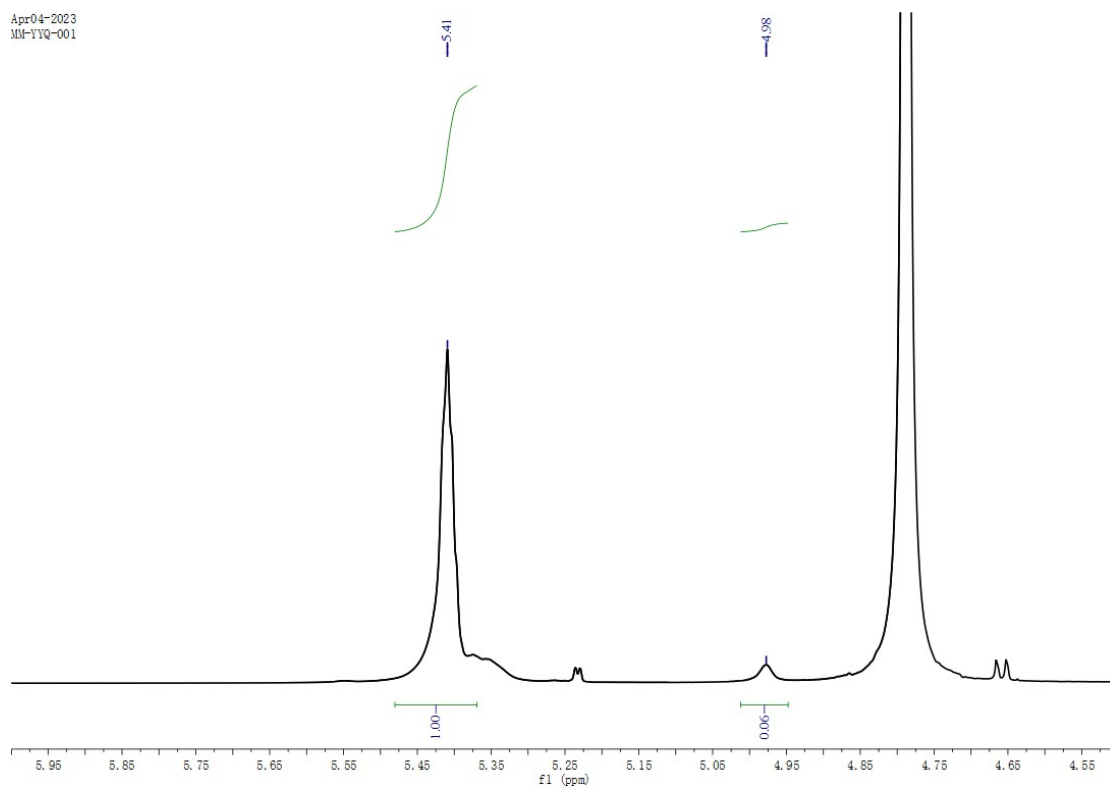

(b)

Apr04-2023  
MM-Y1Q-005

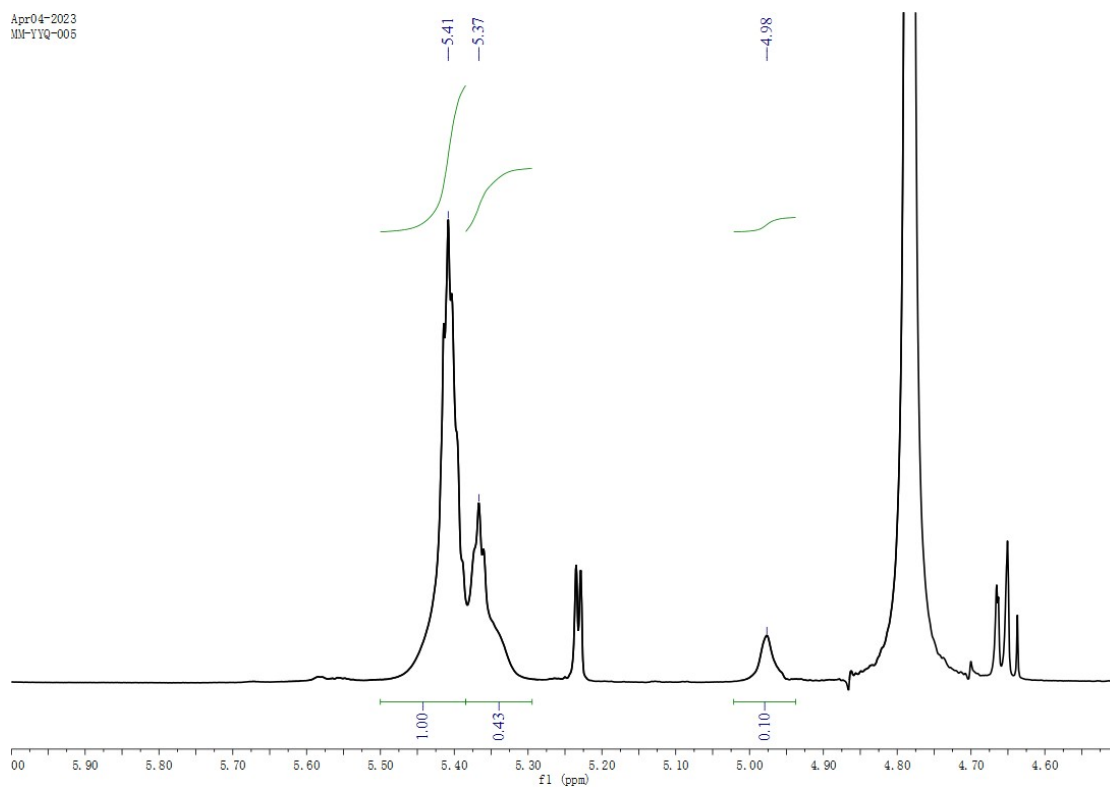

Fig.S2. <sup>1</sup>H NMR spectra of MD-2 and 4,3- $\alpha$ -GTase treated MD-2 for 72 h.
